# Supplementary material for: Genome-wide association study for salinity tolerance at the flowering stage in a panel of rice accessions from Thailand
Source: PubMed Central journal article supplement (PMC6343365; doi:10.1186/s12864-018-5317-2), 2019-01-22
Supplement: 12864_2018_5317_MOESM3_ESM.pdf [file 12864_2018_5317_MOESM3_ESM.pdf]

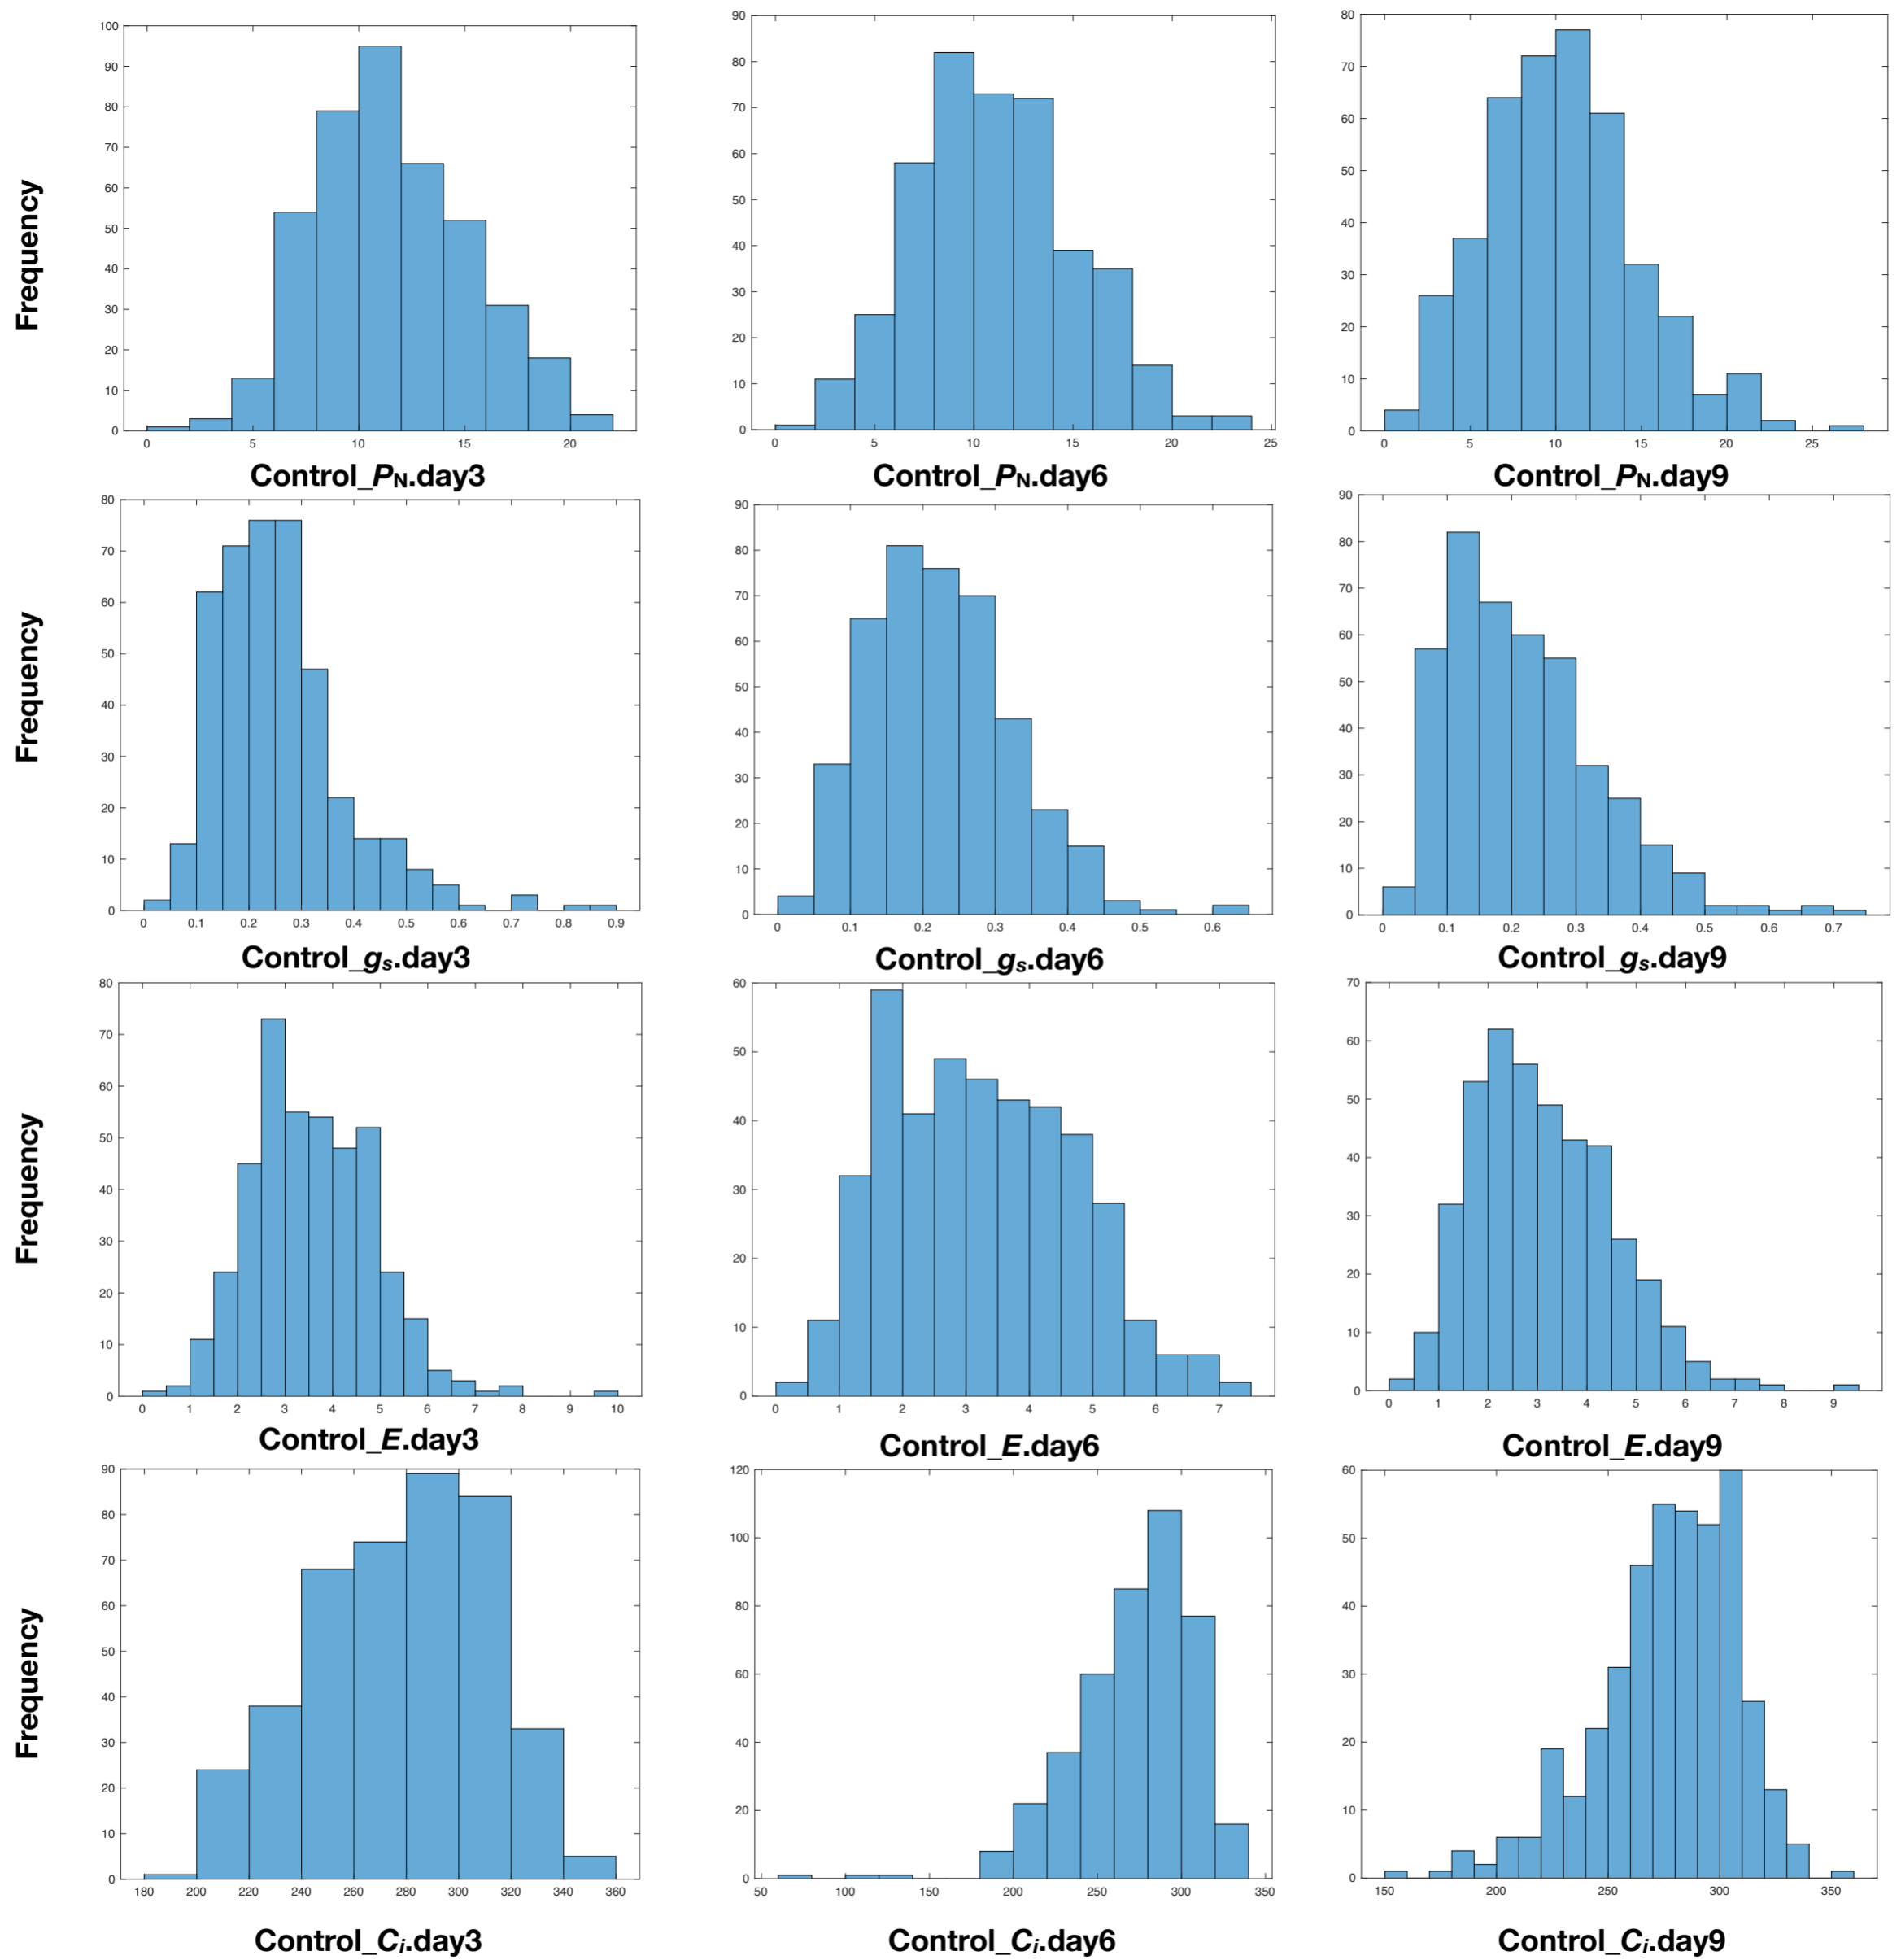

**Figure S1a**  $P_N$ : Net photosynthetic rate;  $g_s$ : Stomatal conductance;  $E$ : Transpiration rate;  $C_i$ : Intercellular  $CO_2$  concentration for 104 rice accessions under control condition

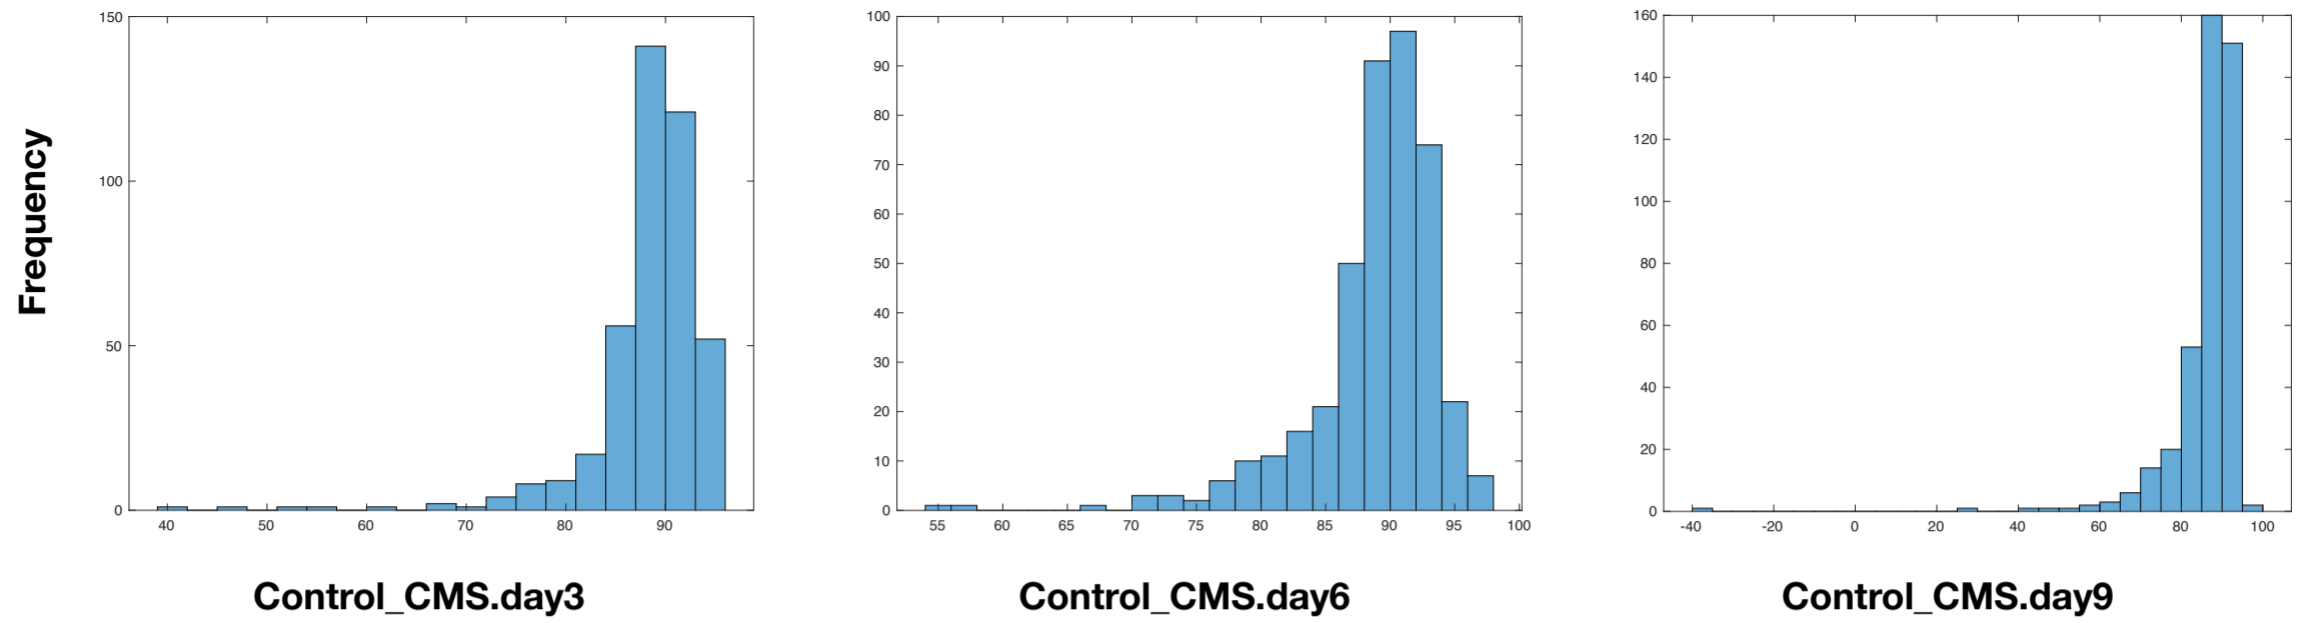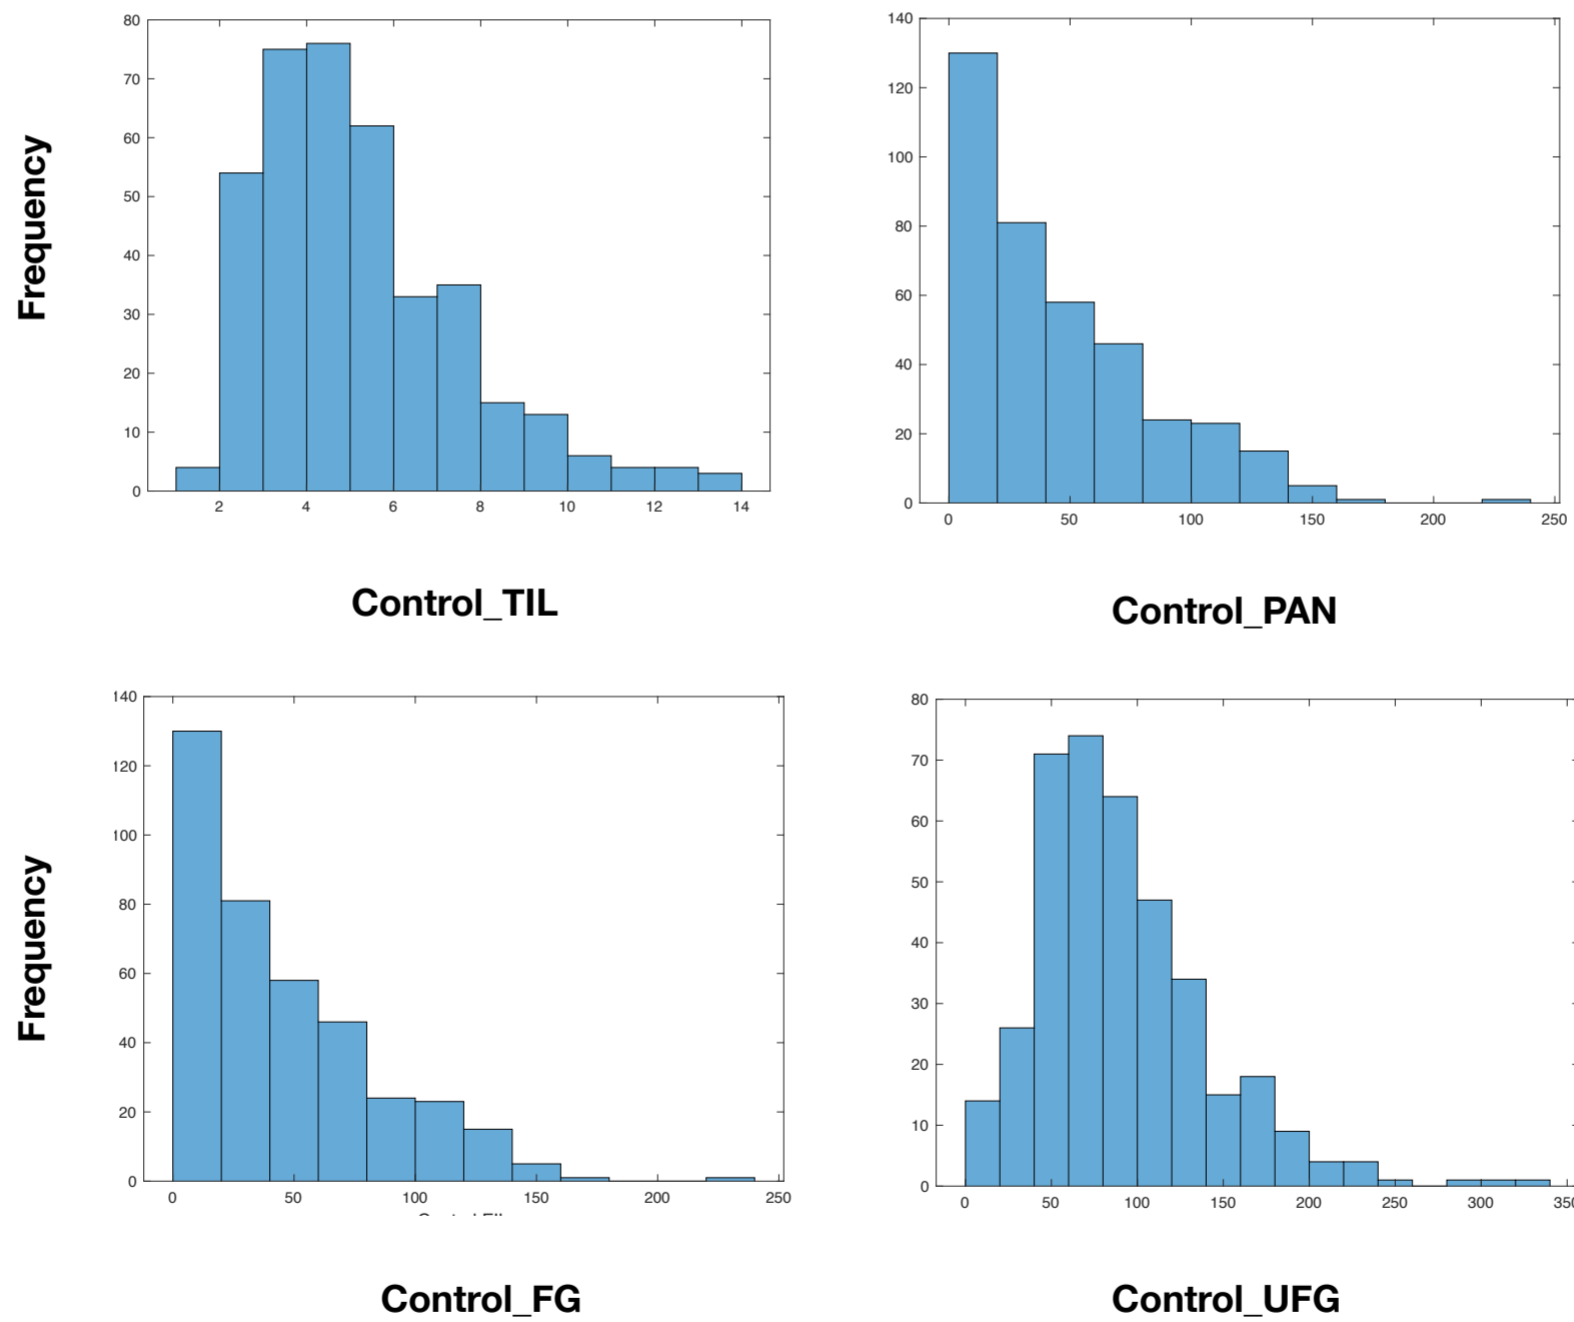

**Figure S1b** CMS: cell membrane stability; TIL: Number of tillers per plant; PAN: Number of panicles per plant; FG: Number of filled grains per plant and UFG: number of unfilled grains per plant for 104 rice accessions under control condition

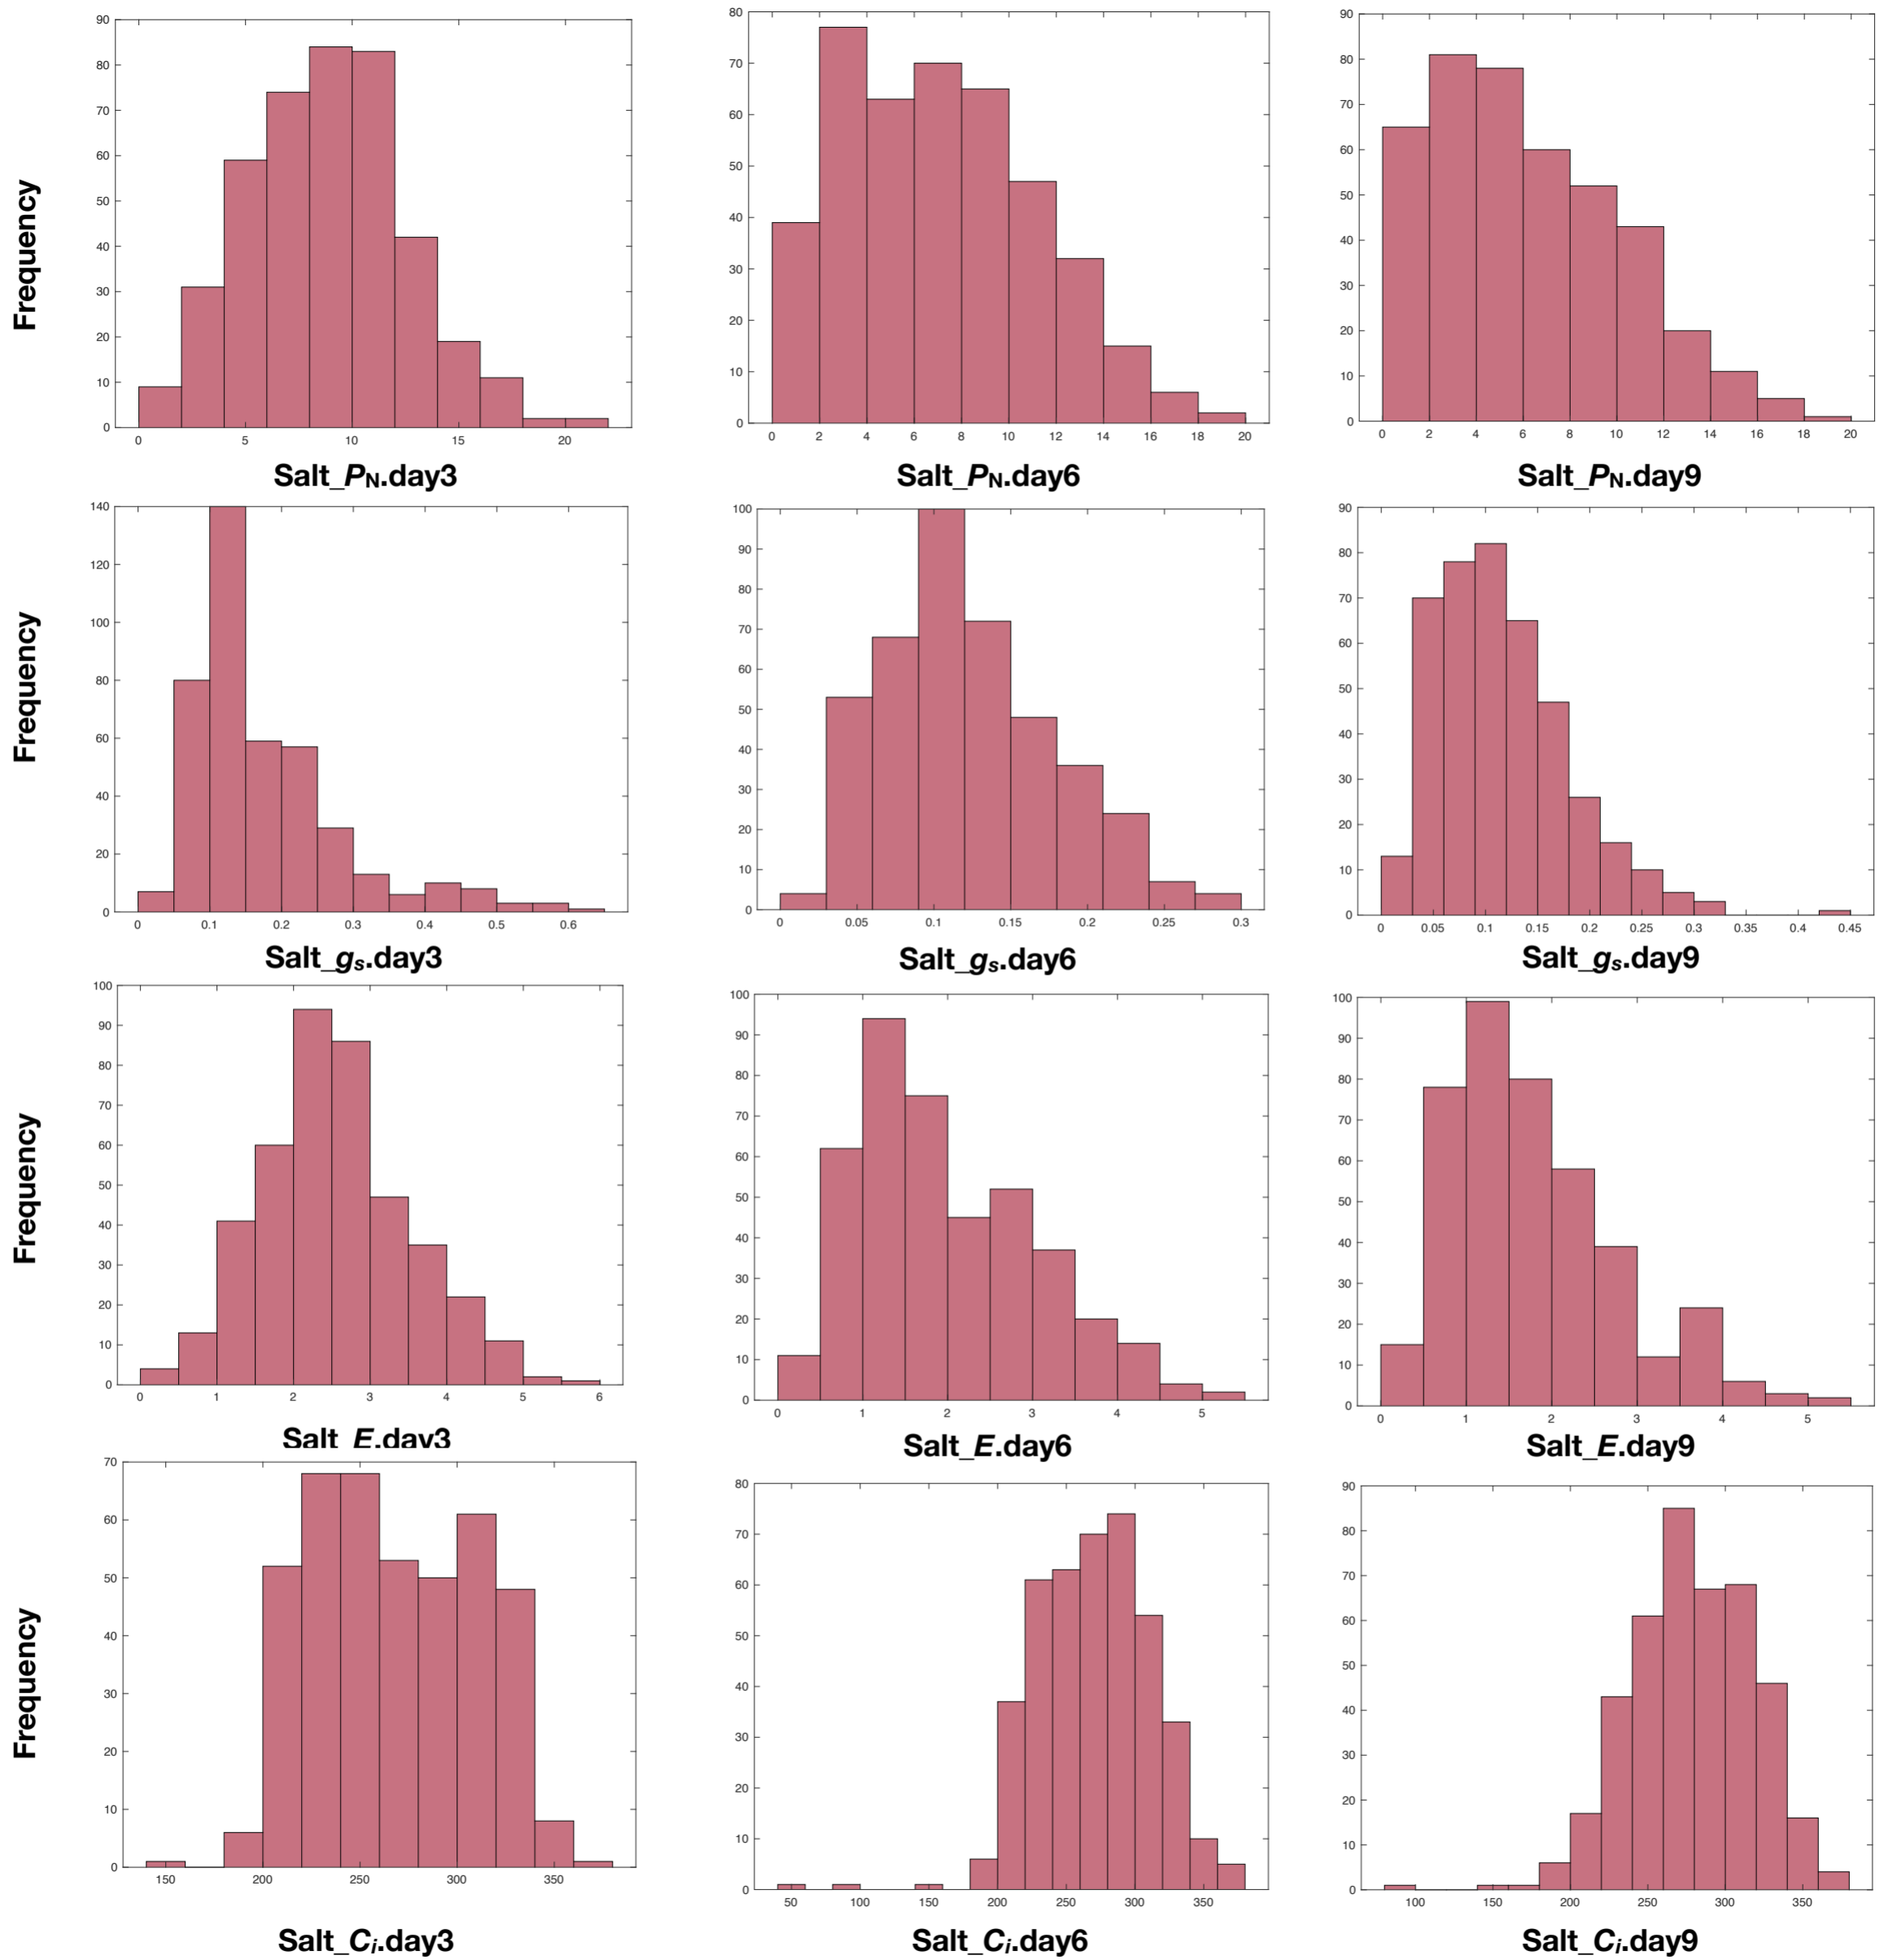

**Figure S1c**  $P_N$ : Net photosynthetic rate;  $g_s$ : Stomatal conductance;  $E$ : Transpiration rate;  $C_i$ : Intercellular  $CO_2$  concentration for 104 rice accessions under salt stress condition

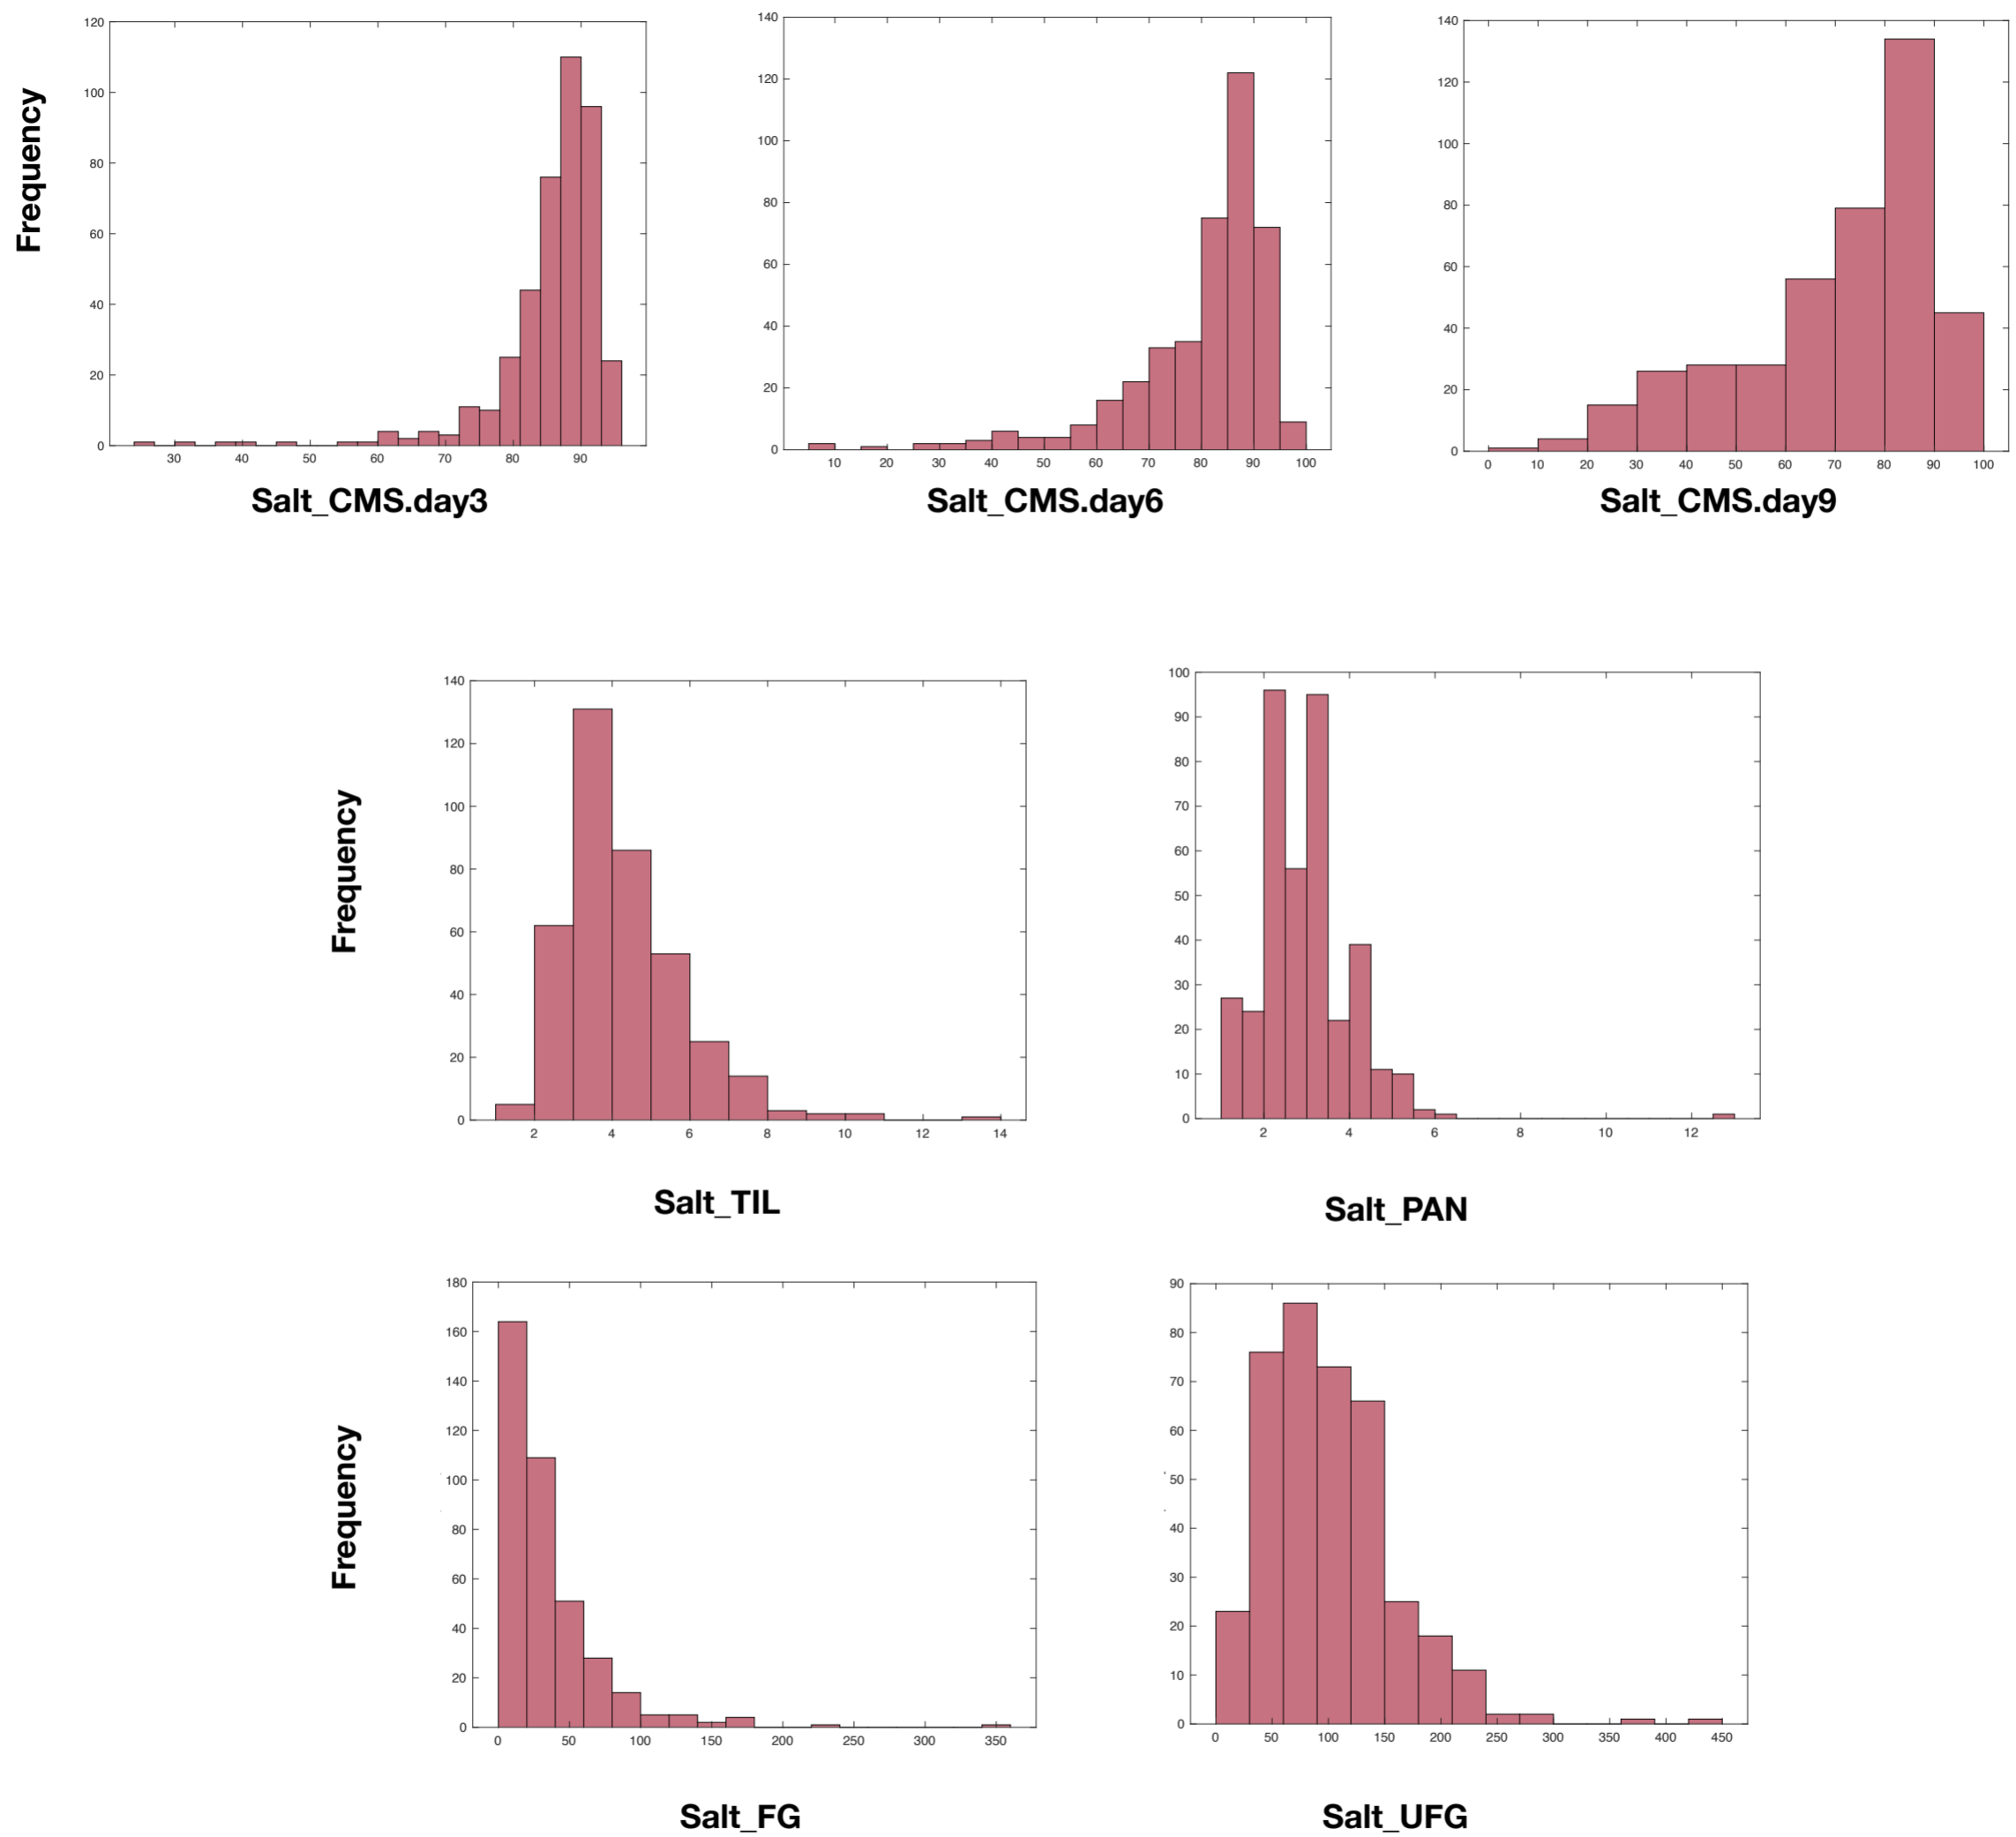

**Figure S1d** CMS: cell membrane stability; TIL: Number of tillers per plant; PAN: Number of panicles per plant; FG: Number of filled grains per plant and UFG: number of unfilled grains per plant for 104 rice accessions under salt stress condition
